# Supplementary material for: Liposomal Delivery of MIW815 (ADU-S100) for Potentiated STING Activation
Source: MDPI journal article supplement (doi:10.3390/pharmaceutics15020638), 2023-02-14
Supplement: s1 [file s1]

## Supplementary Materials

# Liposomal Delivery of MIW815 (ADU-S100) for Potentiated STING Activation

Nan Ji <sup>1,†</sup>, Minjia Wang <sup>1,†</sup>, and Chalet Tan <sup>2,\*</sup>

1 Department of Pharmaceutics and Drug Delivery, University of Mississippi, University, MS 38677, USA

2 Department of Pharmaceutical Sciences, University of Tennessee Health Science Center, Memphis, TN 38163, USA.

<sup>†</sup> These authors contributed equally to this work.

\* Correspondence: ctan5@uthsc.edu (C.T.)

**Table S1.** Size distribution and zeta potential of liposomal ADU-S100 formulations with varying amounts of DOTAP and PEGylation. Results are presented as the mean  $\pm$  SD (n  $\geq$  3).

| Formulation     | DOTAP: HSPC: Cholesterol:<br>PEG <sub>2000</sub> -DSPE (mol%) | N/P<br>ratio | Size (nm), PDI                      | Zeta potential<br>(mV) |
|-----------------|---------------------------------------------------------------|--------------|-------------------------------------|------------------------|
| F1              | 45:0:50:5                                                     | 20:1         | 102.62 $\pm$ 3.87 (0.18 $\pm$ 0.01) | 13.73 $\pm$ 1.19       |
| F2              | 34:11:50:5                                                    | 15:1         | 105.30 $\pm$ 3.10 (0.17 $\pm$ 0.02) | 12.53 $\pm$ 1.62       |
| F3              | 22:23:50:5                                                    | 10:1         | 100.70 $\pm$ 6.77 (0.15 $\pm$ 0.05) | 12.00 $\pm$ 2.56       |
| F4              | 11:34:50:5                                                    | 5:1          | 91.39 $\pm$ 9.62 (0.16 $\pm$ 0.02)  | 9.16 $\pm$ 2.90        |
| F5              | 6:39:50:5                                                     | 2.5:1        | 87.44 $\pm$ 7.72 (0.16 $\pm$ 0.03)  | 5.24 $\pm$ 3.11        |
| F6              | 34:11:50:0                                                    | 15:1         | 85.34 $\pm$ 6.48 (0.25 $\pm$ 0.03)  | 46.80 $\pm$ 3.97       |
| F7              | 34:11:50:10                                                   | 15:1         | 92.43 $\pm$ 6.43 (0.13 $\pm$ 0.02)  | 9.07 $\pm$ 3.00        |
| F8 (MIX lipo)   | 34:11:50:5                                                    | 15:1         | 98.30 $\pm$ 3.70 (0.14 $\pm$ 0.02)  | 7.73 $\pm$ 1.82        |
| F9 (blank lipo) | 34:11:50:5                                                    | 15:1         | 96.50 $\pm$ 4.10 (0.15 $\pm$ 0.02)  | 11.83 $\pm$ 1.42       |

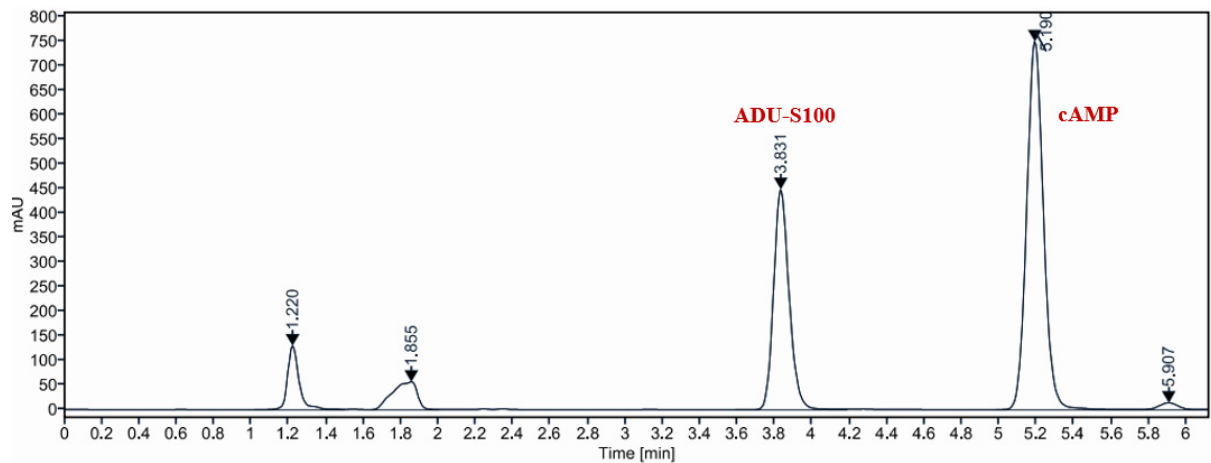

**Figure S1.** HPLC chromatogram of ADU-S100 and cAMP (internal standard).

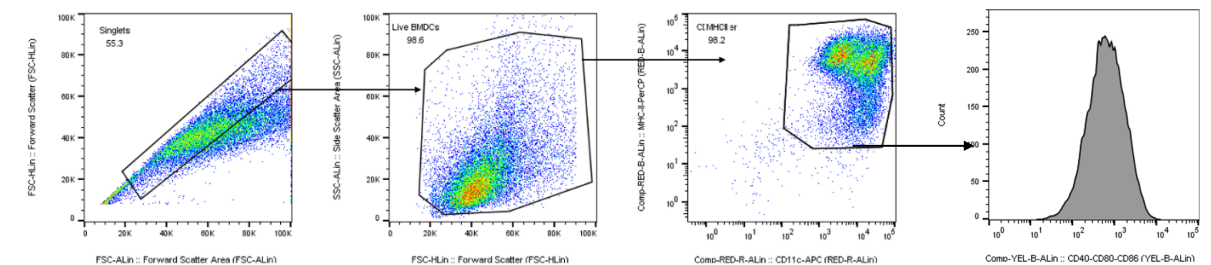

**Figure S2.** Flow cytometry gating strategy for analyzing BMDCs and the expression of co-stimulatory molecules.

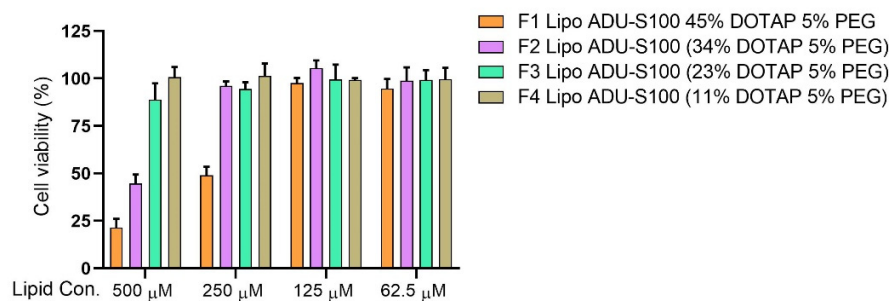

**Figure S3.** Cell viability assays of liposomal ADU-S100 with varying levels of DOTAP. Human lung carcinoma A549 cells were treated with liposomal ADU-S100 formulations at four lipids concentrations (500, 250, 125, 62.5  $\mu$ M), which corresponded to four ADU-S100 concentrations (4, 2, 1, 0.5  $\mu$ g/ml). After a 48-h incubation, the cell viability assay was measured by CyQUANT XTT cell viability kit (Invitrogen) according to the manufacturer's protocol.

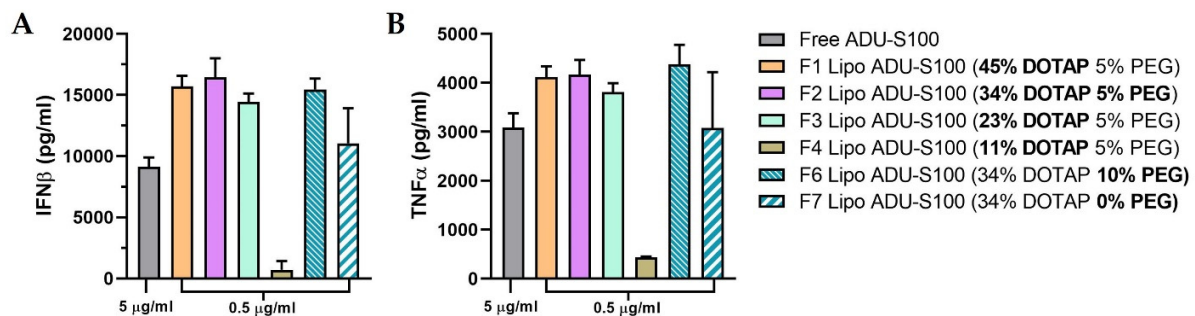

**Figure S4.** Production of TNF $\alpha$  (A) and IFN $\beta$  (B) in BMDCs after stimulation with free ADU-S100 (5  $\mu$ g/ml) or liposomal ADU-S100 (0.5  $\mu$ g/ml) for 24 h. Data are shown as the mean  $\pm$  SD ( $n \geq 3$ ) and are representative of three independent experiments.

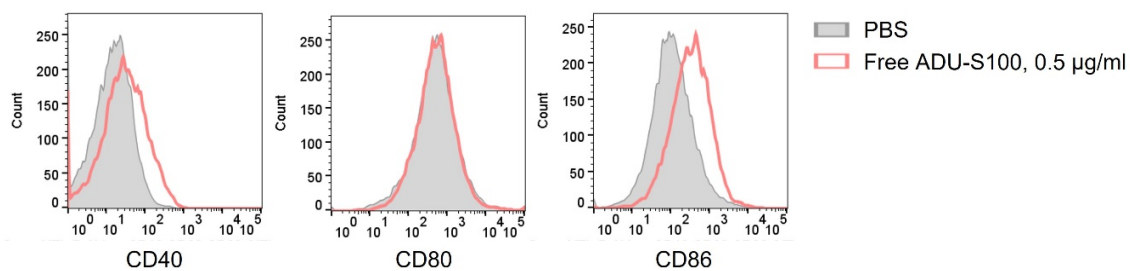

**Figure S5.** Representative flow plots of CD40, CD80, and CD86 expression after stimulation of BMDCs with PBS and free ADU-S100 (0.5  $\mu$ g/ml) for 6 h. Data are representative of three independent experiments.
